# Supplementary material for: Growing old, yet staying young: The role of telomeres in bats’ exceptional longevity
Source: PubMed Central journal article supplement — Sci Adv. 2018 Feb 7;4(2):eaao0926. doi: 10.1126/sciadv.aao0926 (PMC5810611; doi:10.1126/sciadv.aao0926), 2018-02-07
Supplement: aao0926_SM.pdf [file aao0926_SM.pdf]

## Supplementary Materials for

### **Growing old, yet staying young: The role of telomeres in bats' exceptional longevity**

Nicole M. Foley, Graham M. Hughes, Zixia Huang, Michael Clarke, David Jebb, Conor V. Whelan, Eric J. Petit, Frédéric Touzalin, Olivier Farcy, Gareth Jones, Roger D. Ransome, Joanna Kacprzyk, Mary J. O'Connell, Gerald Kerth, Hugo Rebelo, Luísa Rodrigues, Sébastien J. Puechmaille, Emma C. Teeling

Published 7 February 2018, *Sci. Adv.* **4**, eaao0926 (2018)  
DOI: 10.1126/sciadv.aao0926

#### **This PDF file includes:**

- Supplementary Text
- table S1. Details of capture and sampling permits for each population included in this study.
- table S2. Detailed model input and output.
- table S3. List of taxa and tissues used in the comparative transcriptome analysis of telomere maintenance genes.
- table S4. Summary of alignment details for the RefSeq and RefSeq + MAKER data sets used in the selective pressure variation tests of telomere maintenance genes.
- table S5. List of eutherian mammal genomes mined for the selective pressure heterogeneity analyses.
- table S6. Positive selection test results for the RefSeq + MAKER and RefSeq-only data sets.
- table S7. Divergent selection test results for the RefSeq + MAKER and RefSeq-only data sets.
- table S8. Detailed model output and  $R^2$  values for LMMs fitted to data sets with the 0-age cohort removed to facilitate a comparison of slopes (effect sizes).
- table S9. Results of pairwise comparisons of DEGs in *Myotis* compared to other mammals across tissue types.
- table S10. GO terms corresponding to biological processes that are significantly enriched in the telomere maintenance protein-protein interaction network.
- table S11. KEGG pathways that are significantly enriched in the telomere maintenance protein-protein interaction network.

- fig. S1. LMMs fitted to each data set after the removal of the 0-age cohort.
- fig. S2. Analysis of  $P$  values arising from 100 jackknifed models of telomere length versus age.
- fig. S3. Analysis of slope values arising from 100 jackknifed models of telomere length versus age.
- fig. S4. Randomly subsampled *M. myotis* and *R. ferrumequinum* data sets containing equal numbers of samples per age cohort recapitulate results from Fig. 2 and show that telomeres shorten in *R. ferrumequinum*, but we do not detect a significant relationship between rTL and age in *M. myotis*.
- fig. S5. Upper quartile regression analysis.
- fig. S6. Tree topology used for selective pressure analyses.
- fig. S7. Schematic depicting steps in the OH-SNAP workflow to automate CodeML analysis.
- fig. S8. STRING protein-protein interaction network for 14 significantly DEGs in *Myotis* bats compared to all other mammals.
- References (71–94)

## Supplementary Text

### *Telomere Length Analysis*

The jackknife analyses confirmed the robustness of our results. The analysis returned a significant relationship between rTL and age in 90% of replicates for *R. ferrumequinum* and 100% in *Miniopterus schreibersii* (fig. S1a-b). In the case of *M. myotis* and *M. bechsteinii* a significant result was returned in only 5% and 2% of replicates respectively (fig. S1c-d). Direct jackknife comparison of the two largest data sets, *M. myotis* and *R. ferrumequinum* containing equal age cohorts and equal numbers of samples per age cohort (1-6+ yrs; n=91) recapitulated initial results: show that telomeres shorten in *R. ferrumequinum* but do not detect a significant relationship between rTL and age in *M. myotis* (fig. S3).

The LMMs fitted to each data set with the 0 age cohort removed recapitulate the results from data sets analysed with the 0 age cohort included (fig. S7). Detailed model outputs are described in table S8. These results suggest that the difference in significance between models fitted to *Myotis* bats and all other bats is not simply due to differences in effect size. The conditional  $r^2$  values suggest that most of the variance in the *R. ferrumequinum* data set is captured by the model ( $r^2_c = 0.919$ ), while less variance is explained by models fitted to either *Myotis* data set (*M. bechsteinii*  $r^2_c = 0.85$ ; *M. myotis*  $r^2_c = 0.422$ ). This suggests that potentially some unknown factor, besides age, influences telomere dynamics in these species.

### *Tests of Selective Pressure Variation*

Our analyses of selective pressure variation did not detect evidence of positive or divergent selection on the branches leading to *R. ferrumequinum* (Fig. 4d and table S7). Genome quality is a factor potentially impacting our results in *R. ferrumequinum*. This unannotated genome is low coverage (17X) and mining with our custom MAKER pipeline resulted in far fewer targeted sequences recovered (113/225) (Fig. 4). *SETX* and *CCT5*, which were shown to be evolving under divergent selection in the genus *Myotis* and *Miniopterus natalensis* respectively, are included in our *R. ferrumequinum* data set (*MYC*, *ATM* and *HNRNPU* could not be successfully mined) but are not significant, suggesting that other longevity mechanisms may have evolved in this species. Improvements to the existing *R. ferrumequinum* genome will aid our understanding of mechanisms contributing to longevity in this species. A *Rhinolophus sinicus* genome was published after completion of this analysis (71), inclusion of this data in future analyses is recommended. While *TEP1* and *TERF1* have been shown to be evolving under positive selection in the naked mole rat (72), we do not find the same result in our analyses.

Given recent critical assessments of genome scan studies (73), to account for differences in genome coverage and quality across our eutherian data set, only genes which were significantly recovered through analysis of the RefSeq and RefSeq + MAKER data sets, after FDR were considered robust for all selection tests. This somewhat conservative approach ensured our results were robust to the removal and addition of data.

Our selective pressure analyses on the *Miniopterus natalensis* branch showed that *CCT5*, *HNRNPU* and *LIG1* evolved under divergent selection in *Miniopterus natalensis* (Fig. 4b and table S7). *LIG1* is a DNA ligase that is a key component of replication, recombination and repair of DNA, which seals double stranded breaks (74). In addition to its role in telomere maintenance *CCT5* is a subunit of the chaperonin TRiC which maintains proteostasis through facilitating protein folding and sequestering unfolded proteins (75). Similarly *HNRNPU*, from the hnRNP gene family, is involved in a variety of

proteostatic processes that influence gene expression through the metabolism, regulation and trafficking of RNA (76). These particular results are supported by previous studies which have shown a role for improved proteostasis in longer lived species, compared to short-lived related species (77). Telomere shortening with age in the closely related *Miniopterus schreibersii* coupled with divergent evolution observed in these telomere maintenance genes, suggest that potentially enhanced proteostasis has played a greater role in the evolution of longevity in the genus *Miniopterus* than telomere maintenance, compared to *Myotis* species. Although, as this study targets only a subset of genes involved in telomere maintenance, it would be informative to perform a genome-wide selective pressure analysis as well as transcriptomic analyses in *Miniopterus* species to fully elucidate if enhanced proteostasis played a role in the evolution of *Miniopterus* species.

Previous studies have proposed a link between immunity, longevity and flight in bats (78), a similar trend is observed in our results. *MYC*, which is evolving under divergent selection in the ancestral bat branch, has been shown to play a key role in the development, differentiation and activation of immune cells. Previous studies of microRNAs have posited a link between inflammation, replicative senescence and longevity (22, 79). In the genus *Myotis*, human experiments have shown that *ATM* regulates *NF- $\kappa$ B* which is key in triggering the adaptive and innate immune responses (80), while *SETX* has been shown to attenuate the magnitude of the host response to viral infection and controls viral biogenesis (81). In *Miniopterus natalensis* *HNRNPU* enhances the expression of the pro-inflammatory cytokine *TNF $\alpha$*  (82). Previous analyses which detected positive selection in *ATM* along the ancestral bat branch contained two species, *Pteropus alecto* and *Myotis davidii* (78). Results presented here, suggest that this result may be driven by the presence of *M. davidii* in their data set, as here we show *ATM* is evolving under divergent selection in the genus *Myotis*, but not along the bat ancestral branch. Our results provide further targets with which to test support for hypotheses relating immunity, longevity and flight in bats (78).

#### *Comparative Transcriptomic Analysis of Telomere Maintenance Genes*

The expression levels of telomere maintenance genes were investigated and compared between *Myotis* bats and seven other mammalian species across four tissue types: blood, kidney, liver and brain. Pairwise comparisons indicated that a wide range of telomere maintenance genes (36.5% ~ 70.9%) were differentially expressed (FDR < 0.05) between bat and other mammal species. A significant number of DEGs were downregulated in bats compared to cow and whale, while DEGs were much more up-regulated in bats compared to human, mouse, rat, naked mole rat and pig (table S9). The STRING protein-protein interaction network showed interactions between 14 upregulated genes (fig. S8) and indicated an isolated interaction between GNL3L and SSB (not shown). The resulting network showed functional enrichment for 54 Biological Process GO terms and 6 KEGG pathways (tables S10-11). Besides GO terms associated with telomere maintenance, after FDR correction the network analysis showed significant functional enrichment ( $p$ -value < 0.05) for several biological processes involved in DNA repair (tables S10-11).

**table S1. Details of capture and sampling permits for each population included in this study.**

| Species                          | Country  | Permit(s)                                                 | Permit Issued By                               | Permit Holder                                           | Duration                                        | Access to field sites facilitated by:                    |
|----------------------------------|----------|-----------------------------------------------------------|------------------------------------------------|---------------------------------------------------------|-------------------------------------------------|----------------------------------------------------------|
| <i>Myotis myotis</i>             | France   | Arrêté préfectoral (18/07/2013 & 05/08/2013)              | Préfet du Morbihan                             | Eric Petit, Frédéric Touzalin and Sébastien Puechmaille | 15th June - 15th September; 2013-2017 inclusive | local authorities in collaboration with Bretagne Vivante |
|                                  |          | Arrêté préfectoral (26/09/2016)                           | Préfet du Morbihan                             | Frédéric Touzalin and Sébastien Puechmaille             | 26th August 2016 - 31st December 2020           | local authorities in collaboration with Bretagne Vivante |
| <i>Rhinolophus ferrumequinum</i> | UK       | 2015-11974-SCI-SCI PPL30/30 25                            | Natural England/Home Office                    | Roger Ransome / Gareth Jones                            | 2014-2016                                       | Woodchester Mansion Trust                                |
| <i>Myotis bechsteinii</i>        | Germany  | 55.1-8642.01-2/00<br>55.2-2531.01-47/11<br>55.2-2532-2-20 | Government of Lower Frankonia                  | Gerald Kerth                                            | 2011-2020                                       | Local forest department                                  |
| <i>Miniopterus schreibersii</i>  | Portugal | 452/2016/CAPT                                             | Institute for Nature Conservation and Forestry | Hugo Rebelo                                             | 2016                                            | N/A                                                      |

**table S2. Detailed model input and output.** A suite of models were fitted to each data set: a linear model (LM), a parabolic model (PM), a piecewise-linear model (PLM) and a linear mixed model (LMM). The best scoring AIC value is shown in bold. All models were analysed using rTL as the response variable and Age as the explanatory variable. Detailed output for the best model is shown.

| Species                          | Models Tested | Ranked AIC     | Best Model | Random Variables                           | Fixed Effect | Estimate | Standard Error | t-value | p-value  |
|----------------------------------|---------------|----------------|------------|--------------------------------------------|--------------|----------|----------------|---------|----------|
| <i>Myotis myotis</i>             | LMM           | <b>79.17</b>   | LMM        | DNA Plate, Assay Plate<br>and Year Sampled | Intercept    | 1.492    | 0.092          | 16.173  | 0        |
|                                  | PM            | 142.56         |            |                                            | Age          | -0.019   | 0.013          | -1.409  | 0.161    |
|                                  | PLM           | 143.61         |            |                                            |              |          |                |         |          |
|                                  | LM            | 145.16         |            |                                            |              |          |                |         |          |
| <i>Myotis bechsteinii</i>        | LMM           | <b>107.93</b>  | LMM        | DNA Plate, Assay Plate<br>and Year Sampled | Intercept    | 2.817    | 0.649          | 4.342   | 0.213    |
|                                  | LM            | 158.78         |            |                                            | Age          | -0.021   | 0.019          | -1.119  | 0.27     |
|                                  | PM            | 160.41         |            |                                            |              |          |                |         |          |
|                                  | PLM           | 162.73         |            |                                            |              |          |                |         |          |
| <i>Rhinolophus ferrumequinum</i> | LMM           | <b>-350.24</b> | LMM        | DNA Plate and Assay Plate                  | Intercept    | 0.986    | 0.174          | 5.671   | 0.105    |
|                                  | PLM           | -133.38        |            |                                            | Age          | -0.004   | 0.001          | -3.268  | 0.001*** |
|                                  | PM            | -105.07        |            |                                            |              |          |                |         |          |
|                                  | LM            | -85.56         |            |                                            |              |          |                |         |          |
| <i>Miniopterus schreibersii</i>  | LM            | <b>-41.24</b>  | LM         | NA                                         | Intercept    | 1.738    | 0.034          | 51.559  | 0        |
|                                  | PM            | -40.43         |            |                                            | Age          | -0.024   | 0.005          | -5.041  | 0.000*** |
|                                  | PLM           | -38.42         |            |                                            |              |          |                |         |          |
|                                  | LMM           | -23.69         |            |                                            |              |          |                |         |          |

**table S3. List of taxa and tissues used in the comparative transcriptome analysis of telomere maintenance genes.** \* followed by a tissue indicates that there is no publication associated with this data set.

|                              | <b>Common Name</b>      | <b>Blood</b> | <b>Kidney</b> | <b>Liver</b> | <b>Brain</b> | <b>Data Source</b>                                           |
|------------------------------|-------------------------|--------------|---------------|--------------|--------------|--------------------------------------------------------------|
| <i>Myotis brandtii</i>       | Brandt's bat            | NA           | 2             | 2            | 1            | (83)                                                         |
| <i>Myotis myotis</i>         | Greater mouse-eared bat | 4            | NA            | NA           | NA           | (49)                                                         |
| <i>Bos taurus</i>            | Cow                     | NA           | 4             | 4            | 4            | (84)                                                         |
| <i>Sus scrofa</i>            | Pig                     | 3            | 1             | 2            | NA           | (85-87)                                                      |
| <i>Balaena mysticetus</i>    | Bowhead whale           | NA           | 4             | 3            | NA           | (88)                                                         |
| <i>Homo sapiens</i>          | Human                   | 6            | 3             | 4            | 3            | (89, 90) *liver; *brain;                                     |
| <i>Mus musculus</i>          | Mouse                   | 4            | 2             | 3            | 3            | (91, 92); The ENCODE Consortium 2011 (kidney and liver data) |
| <i>Rattus norvegicus</i>     | Rat                     | NA           | 3             | 3            | 3            | (93)                                                         |
| <i>Heterocephalus glaber</i> | Naked mole rat          | NA           | 2             | 3            | 3            | (72, 94); *kidney;                                           |

**table S4. Summary of alignment details for the RefSeq and RefSeq + MAKER data sets used in the selective pressure variation tests of telomere maintenance genes.**

| <b>Gene</b>    | <b>Ref Seq + MAKER Data</b> |                         | <b>RefSeq</b>      |                         |
|----------------|-----------------------------|-------------------------|--------------------|-------------------------|
|                | <b>No. of Taxa</b>          | <b>Alignment Length</b> | <b>No. of Taxa</b> | <b>Alignment Length</b> |
| <i>ABL1</i>    | 45                          | 3276                    | 45                 | 3276                    |
| <i>ABL2</i>    | 47                          | 3375                    | 46                 | 3375                    |
| <i>ACD</i>     | 45                          | 1290                    | 45                 | 1290                    |
| <i>AKT1</i>    | 38                          | 1431                    | 37                 | 1431                    |
| <i>APEX1</i>   | 52                          | 951                     | 51                 | 951                     |
| <i>ATM</i>     | 45                          | 9138                    | 44                 | 9138                    |
| <i>ATP5C1</i>  | 50                          | 825                     | 50                 | 825                     |
| <i>ATR</i>     | 43                          | 7917                    | 43                 | 7884                    |
| <i>ATRX</i>    | 44                          | 7314                    | 43                 | 7314                    |
| <i>AURKB</i>   | 49                          | 1020                    | 49                 | 1020                    |
| <i>BCL2</i>    | 47                          | 582                     | 44                 | 582                     |
| <i>BLM</i>     | 49                          | 4242                    | 48                 | 4233                    |
| <i>BRCA1</i>   | 49                          | 2196                    | 45                 | 2193                    |
| <i>BRCA2</i>   | 44                          | 9963                    | 43                 | 9951                    |
| <i>BRIP1</i>   | 43                          | 3471                    | 43                 | 3459                    |
| <i>CBX1</i>    | 49                          | 543                     | 48                 | 543                     |
| <i>CBX3</i>    | 46                          | 546                     | 44                 | 546                     |
| <i>CBX5</i>    | 49                          | 573                     | 49                 | 573                     |
| <i>CCDC79</i>  | 45                          | 2133                    | 45                 | 2127                    |
| <i>CCDC155</i> | 49                          | 1350                    | 48                 | 1350                    |
| <i>CCT2</i>    | 52                          | 1578                    | 52                 | 1578                    |
| <i>CCT3</i>    | 51                          | 1629                    | 50                 | 1629                    |
| <i>CCT4</i>    | 50                          | 1581                    | 50                 | 1581                    |
| <i>CCT5</i>    | 50                          | 1602                    | 49                 | 1599                    |
| <i>CCT6A</i>   | 50                          | 1581                    | 49                 | 1581                    |
| <i>CCT7</i>    | 52                          | 1620                    | 52                 | 1614                    |
| <i>CCT8</i>    | 50                          | 1548                    | 50                 | 1545                    |
| <i>CD19</i>    | 47                          | 1506                    | 43                 | 1497                    |
| <i>CDC45</i>   | 50                          | 1668                    | 50                 | 1668                    |
| <i>CDK2</i>    | 52                          | 873                     | 51                 | 873                     |
| <i>CDKN1A</i>  | 51                          | 474                     | 51                 | 474                     |
| <i>CHEK1</i>   | 52                          | 1251                    | 52                 | 1248                    |
| <i>CHEK2</i>   | 46                          | 1506                    | 46                 | 1503                    |
| <i>CTC1</i>    | 49                          | 3558                    | 48                 | 3546                    |
| <i>CTNNB1</i>  | 52                          | 2337                    | 52                 | 2337                    |
| <i>DCLRE1A</i> | 51                          | 3075                    | 51                 | 3075                    |
| <i>DCLRE1B</i> | 49                          | 1551                    | 48                 | 1551                    |
| <i>DCLRE1C</i> | 44                          | 1743                    | 41                 | 1740                    |
| <i>DHX36</i>   | 49                          | 2865                    | 49                 | 2865                    |
| <i>DMC1</i>    | 49                          | 1017                    | 49                 | 1017                    |



| Ref Seq + MAKER Data |             |                  | RefSeq      |                  |
|----------------------|-------------|------------------|-------------|------------------|
| Gene                 | No. of Taxa | Alignment Length | No. of Taxa | Alignment Length |
| <i>DNA2</i>          | 44          | 3084             | 43          | 3084             |
| <i>DOTIL</i>         | 46          | 4137             | 43          | 4134             |
| <i>DPY30</i>         | 48          | 291              | 46          | 291              |
| <i>DYDC1</i>         | 47          | 507              | 47          | 501              |
| <i>DYDC2</i>         | 41          | 366              | 40          | 366              |
| <i>EGF</i>           | 44          | 3285             | 42          | 3255             |
| <i>EID3</i>          | 50          | 933              | 50          | 933              |
| <i>EME1</i>          | 51          | 1698             | 51          | 1686             |
| <i>ERCC1</i>         | 49          | 849              | 48          | 846              |
| <i>EXO1</i>          | 46          | 2433             | 46          | 2433             |
| <i>FANCA</i>         | 45          | 3690             | 42          | 3669             |
| <i>FANCC</i>         | 45          | 1608             | 44          | 1608             |
| <i>FANCE</i>         | 47          | 1218             | 46          | 1218             |
| <i>FANCI</i>         | 48          | 3915             | 48          | 3909             |
| <i>FANCL</i>         | 44          | 1095             | 44          | 1092             |
| <i>FBXO4</i>         | 47          | 972              | 47          | 972              |
| <i>FEN1</i>          | 51          | 1137             | 51          | 1137             |
| <i>GARI</i>          | 45          | 507              | 44          | 504              |
| <i>GNL3</i>          | 51          | 1566             | 51          | 1563             |
| <i>GNL3L</i>         | 46          | 1650             | 45          | 1650             |
| <i>H2AFX</i>         | 44          | 360              | 44          | 360              |
| <i>H2AFY</i>         | 45          | 1107             | 44          | 1107             |
| <i>H3F3A</i>         | 45          | 408              | 43          | 408              |
| <i>H3F3B</i>         | 45          | 408              | 44          | 408              |
| <i>HAT1</i>          | 49          | 1257             | 49          | 1257             |
| <i>HDAC8</i>         | 45          | 993              | 44          | 993              |
| <i>HMBOX1</i>        | 42          | 1260             | 42          | 1260             |
| <i>HMGA2</i>         | 35          | 246              | 34          | 246              |
| <i>HNRNPA1</i>       | 48          | 1113             | 45          | 1113             |
| <i>HNRNPA2B1</i>     | 48          | 1056             | 48          | 1056             |
| <i>HNRNPC</i>        | 50          | 879              | 50          | 879              |
| <i>HNRNPD</i>        | 45          | 771              | 45          | 771              |
| <i>HNRNPU</i>        | 47          | 1776             | 47          | 1776             |
| <i>HORMAD1</i>       | 49          | 1170             | 49          | 1170             |
| <i>HSP90AA1</i>      | 46          | 2184             | 46          | 2184             |
| <i>HSPAIL</i>        | 34          | 1917             | 33          | 1917             |
| <i>IGF1</i>          | 47          | 396              | 46          | 339              |
| <i>KRAS</i>          | 50          | 450              | 50          | 450              |
| <i>LIG1</i>          | 43          | 2634             | 43          | 2634             |
| <i>MAEL</i>          | 47          | 1290             | 47          | 1287             |
| <i>MAJIN</i>         | 33          | 291              | 33          | 288              |
| <i>MAP2K7</i>        | 49          | 1122             | 47          | 1122             |
| <i>MAP3K4</i>        | 43          | 4326             | 40          | 4320             |

| Ref Seq + MAKER Data |             |                  | RefSeq      |                  |
|----------------------|-------------|------------------|-------------|------------------|
| Gene                 | No. of Taxa | Alignment Length | No. of Taxa | Alignment Length |
| <i>MAPK1</i>         | 43          | 789              | 42          | 789              |
| <i>MAPK3</i>         | 45          | 795              | 45          | 795              |
| <i>MAPK15</i>        | 39          | 951              | 38          | 948              |
| <i>MAPKAPK5</i>      | 50          | 1362             | 50          | 1362             |
| <i>MEI1</i>          | 46          | 3588             | 45          | 3588             |
| <i>MEI4</i>          | 41          | 1140             | 41          | 1131             |
| <i>MEIOB</i>         | 44          | 1281             | 44          | 1281             |
| <i>MLH1</i>          | 50          | 2241             | 50          | 2235             |
| <i>MLH3</i>          | 50          | 4281             | 50          | 4275             |
| <i>MME</i>           | 49          | 2235             | 48          | 2235             |
| <i>MRE11A</i>        | 46          | 2010             | 45          | 2004             |
| <i>MSH2</i>          | 48          | 2781             | 48          | 2778             |
| <i>MSH3</i>          | 44          | 3165             | 42          | 3156             |
| <i>MSH4</i>          | 45          | 2601             | 44          | 2487             |
| <i>MUS81</i>         | 52          | 1581             | 52          | 1581             |
| <i>MUTYH</i>         | 48          | 1518             | 48          | 1518             |
| <i>MYC</i>           | 45          | 1305             | 45          | 1302             |
| <i>NABP2</i>         | 50          | 612              | 49          | 612              |
| <i>NAT10</i>         | 49          | 3069             | 49          | 3069             |
| <i>NBN</i>           | 48          | 1875             | 45          | 1803             |
| <i>NCL</i>           | 46          | 1818             | 44          | 1815             |
| <i>NDC1</i>          | 46          | 2010             | 43          | 2010             |
| <i>NEK2</i>          | 48          | 1311             | 47          | 1227             |
| <i>NEK7</i>          | 44          | 888              | 44          | 888              |
| <i>NHP2</i>          | 50          | 456              | 50          | 453              |
| <i>NOP10</i>         | 46          | 174              | 45          | 174              |
| <i>NSMCE1</i>        | 51          | 759              | 51          | 759              |
| <i>NSMCE2</i>        | 43          | 723              | 41          | 720              |
| <i>NSMCE4A</i>       | 44          | 837              | 43          | 834              |
| <i>NUP98</i>         | 50          | 5361             | 50          | 5361             |
| <i>OBFC1</i>         | 49          | 1059             | 48          | 1059             |
| <i>PALB2</i>         | 47          | 1446             | 46          | 1443             |
| <i>PARP1</i>         | 48          | 2874             | 48          | 2874             |
| <i>PARP2</i>         | 51          | 1623             | 51          | 1608             |
| <i>PARP3</i>         | 46          | 1575             | 46          | 1575             |
| <i>PARP4</i>         | 40          | 4032             | 39          | 4011             |
| <i>PAX8</i>          | 43          | 771              | 43          | 771              |
| <i>PCNA</i>          | 49          | 783              | 49          | 783              |
| <i>PIF1</i>          | 45          | 1407             | 45          | 1407             |
| <i>PINX1</i>         | 42          | 909              | 41          | 909              |
| <i>PKIB</i>          | 46          | 207              | 45          | 207              |
| <i>PLA2R1</i>        | 47          | 4257             | 46          | 4257             |
| <i>PLK1</i>          | 47          | 1704             | 47          | 1704             |

| Ref Seq + MAKER Data |             |                  | RefSeq      |                  |
|----------------------|-------------|------------------|-------------|------------------|
| Gene                 | No. of Taxa | Alignment Length | No. of Taxa | Alignment Length |
| <i>PML</i>           | 43          | 2397             | 42          | 2394             |
| <i>PMS1</i>          | 47          | 2775             | 47          | 2775             |
| <i>PMS2</i>          | 42          | 2430             | 41          | 2373             |
| <i>PNKP</i>          | 47          | 1143             | 47          | 1143             |
| <i>POLA1</i>         | 44          | 4347             | 42          | 4344             |
| <i>POLA2</i>         | 49          | 1755             | 49          | 1755             |
| <i>POLD1</i>         | 47          | 2823             | 47          | 2820             |
| <i>POLD2</i>         | 50          | 1392             | 50          | 1392             |
| <i>POLD3</i>         | 48          | 1365             | 47          | 1365             |
| <i>POLD4</i>         | 47          | 276              | 47          | 276              |
| <i>POLE2</i>         | 41          | 1533             | 41          | 1533             |
| <i>POLE</i>          | 46          | 6618             | 45          | 6618             |
| <i>POT1</i>          | 45          | 1902             | 45          | 1845             |
| <i>PPARG</i>         | 46          | 1422             | 46          | 1422             |
| <i>PPP2R1A</i>       | 42          | 1764             | 42          | 1764             |
| <i>PPP2R1B</i>       | 47          | 1485             | 47          | 1485             |
| <i>PRIM1</i>         | 48          | 1239             | 48          | 1239             |
| <i>PRIM2</i>         | 45          | 1233             | 45          | 1224             |
| <i>PRKCA</i>         | 44          | 1806             | 43          | 1806             |
| <i>PRKCB</i>         | 39          | 1581             | 39          | 1581             |
| <i>PRKCQ</i>         | 48          | 2091             | 48          | 2091             |
| <i>PRKDC</i>         | 42          | 12327            | 41          | 12327            |
| <i>PTGES3</i>        | 50          | 477              | 49          | 477              |
| <i>PURA</i>          | 39          | 654              | 38          | 654              |
| <i>RAD17</i>         | 47          | 2013             | 46          | 2010             |
| <i>RAD21L1</i>       | 46          | 1659             | 46          | 1656             |
| <i>RAD50</i>         | 46          | 3924             | 46          | 3924             |
| <i>RAD51</i>         | 50          | 1017             | 49          | 1017             |
| <i>RAD51C</i>        | 45          | 1059             | 42          | 1056             |
| <i>RAD51D</i>        | 48          | 858              | 48          | 858              |
| <i>RAPGEF1</i>       | 46          | 3195             | 45          | 3195             |
| <i>RASSF1</i>        | 45          | 660              | 45          | 660              |
| <i>RB1</i>           | 45          | 2433             | 44          | 2430             |
| <i>RBL2</i>          | 51          | 3174             | 51          | 3174             |
| <i>REC8</i>          | 49          | 1575             | 49          | 1575             |
| <i>RFC1</i>          | 46          | 3411             | 46          | 3408             |
| <i>RFC2</i>          | 47          | 936              | 47          | 936              |
| <i>RFC3</i>          | 48          | 1056             | 48          | 1056             |
| <i>RFC4</i>          | 51          | 1089             | 51          | 1089             |
| <i>RFC5</i>          | 51          | 996              | 51          | 996              |
| <i>RIF1</i>          | 48          | 7260             | 48          | 7245             |
| <i>RNF8</i>          | 49          | 1326             | 49          | 1326             |
| <i>RPA1</i>          | 49          | 1791             | 49          | 1791             |

| Ref Seq + MAKER Data |             |                  | RefSeq      |                  |
|----------------------|-------------|------------------|-------------|------------------|
| Gene                 | No. of Taxa | Alignment Length | No. of Taxa | Alignment Length |
| <i>RPA2</i>          | 48          | 795              | 48          | 795              |
| <i>RPA3</i>          | 48          | 348              | 47          | 348              |
| <i>RTEL1</i>         | 46          | 3132             | 45          | 3111             |
| <i>SAMHD1</i>        | 44          | 1755             | 44          | 1722             |
| <i>SDE2</i>          | 52          | 1326             | 52          | 1320             |
| <i>SETX</i>          | 48          | 7845             | 46          | 7758             |
| <i>SIRT2</i>         | 51          | 1053             | 51          | 1047             |
| <i>SIRT6</i>         | 45          | 852              | 45          | 849              |
| <i>SLX1A</i>         | 42          | 723              | 42          | 723              |
| <i>SLX4</i>          | 48          | 4647             | 48          | 4560             |
| <i>SMC5</i>          | 45          | 3270             | 44          | 3270             |
| <i>SMC6</i>          | 50          | 3279             | 50          | 3273             |
| <i>SMG1</i>          | 46          | 10881            | 46          | 10881            |
| <i>SMG5</i>          | 47          | 3036             | 47          | 3036             |
| <i>SMG6</i>          | 47          | 4149             | 46          | 4149             |
| <i>SPI</i>           | 48          | 2289             | 45          | 2289             |
| <i>SPATA22</i>       | 40          | 1083             | 39          | 1083             |
| <i>SPO11</i>         | 49          | 1167             | 49          | 1167             |
| <i>SRC</i>           | 47          | 1575             | 47          | 1575             |
| <i>SSB</i>           | 49          | 1209             | 45          | 1209             |
| <i>STAG3</i>         | 48          | 3591             | 47          | 3588             |
| <i>SUN1</i>          | 46          | 2112             | 46          | 2076             |
| <i>SUV39H1</i>       | 44          | 1215             | 44          | 1215             |
| <i>SUV39H2</i>       | 51          | 1050             | 49          | 1050             |
| <i>SYCP1</i>         | 45          | 2916             | 44          | 2916             |
| <i>TCP1</i>          | 49          | 1665             | 48          | 1665             |
| <i>TDG</i>           | 45          | 1119             | 45          | 1116             |
| <i>TELO2</i>         | 49          | 2286             | 47          | 2283             |
| <i>TEN1</i>          | 45          | 309              | 44          | 303              |
| <i>TEP1</i>          | 47          | 7434             | 47          | 7434             |
| <i>TERB2</i>         | 42          | 654              | 42          | 654              |
| <i>TERF1</i>         | 43          | 1245             | 43          | 1062             |
| <i>TERF2</i>         | 43          | 1377             | 43          | 1377             |
| <i>TERF2IP</i>       | 47          | 1140             | 44          | 1128             |
| <i>TERT</i>          | 42          | 2313             | 41          | 2310             |
| <i>TEX15</i>         | 51          | 8286             | 50          | 8283             |
| <i>TFIP11</i>        | 50          | 2502             | 50          | 2502             |
| <i>TGFB1</i>         | 46          | 1005             | 46          | 999              |
| <i>TINF2</i>         | 41          | 1209             | 41          | 1209             |
| <i>TNKS1BP1</i>      | 46          | 4692             | 44          | 4626             |
| <i>TNKS2</i>         | 48          | 2913             | 48          | 2913             |
| <i>TNKS</i>          | 45          | 3780             | 45          | 3780             |
| <i>TP53</i>          | 47          | 1080             | 47          | 1065             |

| Ref Seq + MAKER Data |             |                  | RefSeq      |                  |
|----------------------|-------------|------------------|-------------|------------------|
| Gene                 | No. of Taxa | Alignment Length | No. of Taxa | Alignment Length |
| <i>TP53BP1</i>       | 43          | 5898             | 43          | 5898             |
| <i>TPP1</i>          | 48          | 1659             | 47          | 1659             |
| <i>TREX1</i>         | 44          | 933              | 44          | 933              |
| <i>UBE2B</i>         | 51          | 450              | 50          | 450              |
| <i>UPF1</i>          | 41          | 3105             | 40          | 3105             |
| <i>USP7</i>          | 50          | 3150             | 50          | 3150             |
| <i>WNT16</i>         | 50          | 972              | 50          | 963              |
| <i>WRAP53</i>        | 49          | 1542             | 48          | 1539             |
| <i>WRN</i>           | 45          | 4119             | 43          | 4104             |
| <i>XRCC3</i>         | 39          | 891              | 38          | 888              |
| <i>XRCC5</i>         | 45          | 2097             | 45          | 2097             |
| <i>XRCC6</i>         | 51          | 1806             | 51          | 1803             |
| <i>YLPM1</i>         | 39          | 6330             | 39          | 6330             |

**table S5. List of eutherian mammal genomes mined for the selective pressure heterogeneity analyses.**

| Species                               | Common Name      | Order         | Max. Lifespan (yrs) | Genome mined via MAKER pipeline | Genome Version |
|---------------------------------------|------------------|---------------|---------------------|---------------------------------|----------------|
| <i>Dasypus novemcinctus</i>           | Armadillo        | Cingulata     | 22.3                | FALSE                           | 3              |
| <i>Choloepus hoffmanni</i>            | Sloth            | Pilosa        | NA                  | TRUE                            | 2.0.1          |
| <i>Trichechus manatus latirostris</i> | Manatee          | Sirenia       | 65                  | FALSE                           | 1              |
| <i>Loxodonta africana</i>             | African Elephant | Proboscidea   | 65                  | FALSE                           | 3              |
| <i>Procavia capensis</i>              | Hyrax            | Hyracoidea    | 14.8                | TRUE                            | 2              |
| <i>Orycteropus afer</i>               | Aardvark         | Tubulidentata | 29.8                | FALSE                           | 1              |
| <i>Elephantulus edwardii</i>          | Elephant shrew   | Macroscelidea | NA                  | FALSE                           | 1              |
| <i>Echinops telfairi</i>              | Tenrec           | Afrosoricida  | 19                  | FALSE                           | 2              |
| <i>Condylura cristata</i>             | Star-nosed mole  | Eulipotyphla  | 2.5                 | FALSE                           | 1              |
| <i>Erinaceus europaeus</i>            | European mole    | Eulipotyphla  | 11.7                | FALSE                           | 2              |
| <i>Sorex araneus</i>                  | Shrew            | Eulipotyphla  | 3.2                 | FALSE                           | 2              |

---

| <b>Species</b>                   | <b>Common Name</b>        | <b>Order</b> | <b>Max. Lifespan (yrs)</b> | <b>Genome mined via MAKER pipeline</b> | <b>Genome Version</b> |
|----------------------------------|---------------------------|--------------|----------------------------|----------------------------------------|-----------------------|
| <i>Eidolon helvum</i>            | Straw-coloured fruit bat  | Chiroptera   | 21.8                       | TRUE                                   | 1                     |
| <i>Pteropus alecto</i>           | Black flying fox          | Chiroptera   | 19.7                       | FALSE                                  | 1                     |
| <i>Pteropus vampyrus</i>         | Large flying fox          | Chiroptera   | 20.9                       | FALSE                                  | 2                     |
| <i>Rhinolophus ferrumequinum</i> | Greater horseshoe bat     | Chiroptera   | 30.5                       | TRUE                                   | 1                     |
| <i>Megaderma lyra</i>            | Greater false vampire bat | Chiroptera   | 14                         | TRUE                                   | 1                     |
| <i>Pteronotus parnellii</i>      | Parnell's moustached bat  | Chiroptera   | NA                         | TRUE                                   | 1                     |
| <i>Miniopterus natalensis</i>    | Natal long-fingered bat   | Chiroptera   | NA                         | FALSE                                  | 1                     |
| <i>Eptesicus fuscus</i>          | Big brown bat             | Chiroptera   | 19                         | FALSE                                  | 1                     |
| <i>Myotis brandtii</i>           | Brandt's bat              | Chiroptera   | 41                         | FALSE                                  | 1                     |
| <i>Myotis myotis</i>             | Greater mouse-eared bat   | Chiroptera   | 37.1                       | TRUE                                   | 1                     |
| <i>Myotis davidii</i>            | David's myotis            | Chiroptera   | NA                         | FALSE                                  | 1                     |
| <i>Myotis lucifugus</i>          | Little brown bat          | Chiroptera   | 34                         | FALSE                                  | 2                     |

---

---

| <b>Species</b>                    | <b>Common Name</b> | <b>Order</b>    | <b>Max. Lifespan (yrs)</b> | <b>Genome mined via MAKER pipeline</b> | <b>Genome Version</b> |
|-----------------------------------|--------------------|-----------------|----------------------------|----------------------------------------|-----------------------|
| <i>Balaenoptera acutorostrata</i> | Minke whale        | Cetartiodactyla | 50                         | FALSE                                  | 1                     |
| <i>Bison bison</i>                | Bison              | Cetartiodactyla | 33.5                       | FALSE                                  | 1                     |
| <i>Camelus dromedarius</i>        | Camel              | Cetartiodactyla | 28.4                       | FALSE                                  | 1                     |
| <i>Lipotes vexillifer</i>         | River Dolphin      | Cetartiodactyla | 24                         | FALSE                                  | 1                     |
| <i>Orcinus orca</i>               | Orca whale         | Cetartiodactyla | 90                         | FALSE                                  | 1.1                   |
| <i>Ovis aries</i>                 | Sheep              | Cetartiodactyla | 22.8                       | FALSE                                  | 4                     |
| <i>Sus scrofa</i>                 | Pig                | Cetartiodactyla | 27                         | FALSE                                  | 10.2                  |
| <i>Vicugna pacos</i>              | Llama              | Cetartiodactyla | 25.8                       | FALSE                                  | 2.0.2                 |
| <i>Ailuropoda melanoleuca</i>     | Panda              | Carnivora       | 36.8                       | FALSE                                  | 1                     |
| <i>Canis lupus familiaris</i>     | Dog                | Carnivora       | 20.6                       | FALSE                                  | 3.1                   |
| <i>Felis catus</i>                | Cat                | Carnivora       | 30                         | FALSE                                  | 8                     |
| <i>Mustela putorius</i>           | Ferret             | Carnivora       | 11.1                       | FALSE                                  | 1                     |

---



---

| <b>Species</b>               | <b>Common Name</b>     | <b>Order</b>   | <b>Max. Lifespan (yrs)</b> | <b>Genome mined via MAKER pipeline</b> | <b>Genome Version</b> |
|------------------------------|------------------------|----------------|----------------------------|----------------------------------------|-----------------------|
| <i>Manis pentadactyla</i>    | Pangolin               | Pholidota      | NA                         | TRUE                                   | 1.1.1                 |
| <i>Ceratotherium simum</i>   | Rhinoceros             | Perissodactyla | 45                         | FALSE                                  | 1                     |
| <i>Equus caballus</i>        | Horse                  | Perissodactyla | 57                         | FALSE                                  | 2                     |
| <i>Tupaia chinensis</i>      | Tree shrew             | Scandentia     | NA                         | FALSE                                  | 1                     |
| <i>Heterocephalus glaber</i> | Naked mole rat         | Rodentia       | 31                         | FALSE                                  | 1                     |
| <i>Jaculus jaculus</i>       | Lesser Egyptian jerboa | Rodentia       | 7.3                        | FALSE                                  | 1                     |
| <i>Mesocricetus auratus</i>  | Golden hamster         | Rodentia       | 3.9                        | FALSE                                  | 1                     |
| <i>Mus musculus</i>          | Mouse                  | Rodentia       | 4                          | FALSE                                  | GRCm38                |
| <i>Rattus norvegicus</i>     | Rat                    | Rodentia       | 3.8                        | FALSE                                  | 6                     |
| <i>Ochotona princeps</i>     | Pika                   | Lagomorpha     | 7                          | FALSE                                  | 3                     |
| <i>Oryctolagus cuniculus</i> | Rabbit                 | Lagomorpha     | 9                          | FALSE                                  | 2                     |
| <i>Gorilla gorilla</i>       | Gorilla                | Primates       | 60.1                       | FALSE                                  | 3.1                   |

---

---

| <b>Species</b>                | <b>Common Name</b> | <b>Order</b> | <b>Max. Lifespan (yrs)</b> | <b>Genome mined<br/>via MAKER pipeline</b> | <b>Genome Version</b> |
|-------------------------------|--------------------|--------------|----------------------------|--------------------------------------------|-----------------------|
| <i>Homo sapiens</i>           | Human              | Primates     | 122.5                      | FALSE                                      | GRCh38                |
| <i>Macaca fascicularis</i>    | Macaque            | Primates     | 39                         | FALSE                                      | 5                     |
| <i>Mandrillus leucophaeus</i> | Drill              | Primates     | 39                         | FALSE                                      | 1                     |
| <i>Pan troglodytes</i>        | Chimpanzee         | Primates     | 59.4                       | FALSE                                      | 2.1.4                 |
| <i>Galeopterus variegatus</i> | Flying squirrel    | Dermoptera   | NA                         | FALSE                                      | 3.0.2                 |

---

**table S6. Positive selection test results for the RefSeq + MAKER and RefSeq-only data sets.** Significant results before and after FDR corrections are shown.

| Bat Branch     |      | <i>Myotis</i> Branch |      |                |      | <i>Rhinolophus ferrumequinum</i> Branch |                 |                |      | <i>Miniopterus natalensis</i> Branch |     |                |      | Naked mole rat Branch |      |                |      |                |      |
|----------------|------|----------------------|------|----------------|------|-----------------------------------------|-----------------|----------------|------|--------------------------------------|-----|----------------|------|-----------------------|------|----------------|------|----------------|------|
| RefSeq + MAKER |      | RefSeq               |      | RefSeq + MAKER |      | RefSeq                                  |                 | RefSeq + MAKER |      | RefSeq                               |     | RefSeq + MAKER |      | RefSeq                |      | RefSeq + MAKER |      | RefSeq         |      |
| Pre-FDR        | FDR  | Pre-FDR              | FDR  | Pre-FDR        | FDR  | Pre-FDR                                 | FDR             | Pre-FDR        | FDR  | Pre-FDR                              | FDR | Pre-FDR        | FDR  | Pre-FDR               | FDR  | Pre-FDR        | FDR  | Pre-FDR        | FDR  |
| <i>NCL</i>     | none | <i>NCL</i>           | none | <i>HORMAD1</i> | none | <i>GNL3L</i>                            | <i>SIRT2</i>    | none           | none | NA                                   | NA  | <i>MAP3K4</i>  | none | <i>MAP3K4</i>         | none | <i>FANCA</i>   | none | <i>CCDC79</i>  | none |
| <i>TEP1</i>    |      | <i>TP53BP1</i>       |      | <i>MYC</i>     |      | <i>MSH2</i>                             | <i>TNKS1BP1</i> |                |      |                                      |     | <i>NUP98</i>   |      | <i>POT1</i>           |      | <i>LIG1</i>    |      | <i>FANCA</i>   |      |
| <i>TP53BP1</i> |      | <i>TPP1</i>          |      | <i>POLA2</i>   |      | <i>SIRT2</i>                            |                 |                |      |                                      |     | <i>POLD1</i>   |      | <i>PRKDC</i>          |      | <i>PINX1</i>   |      | <i>LIG1</i>    |      |
| <i>TPP1</i>    |      |                      |      | <i>PRKDC</i>   |      | <i>TNKS1BP1</i>                         |                 |                |      |                                      |     | <i>POT1</i>    |      | <i>SLX4</i>           |      | <i>PMS2</i>    |      | <i>PINX1</i>   |      |
|                |      |                      |      | <i>RBL2</i>    |      |                                         |                 |                |      |                                      |     | <i>PRKDC</i>   |      | <i>SMG1</i>           |      | <i>PRKDC</i>   |      | <i>PMS2</i>    |      |
|                |      |                      |      | <i>STAG3</i>   |      |                                         |                 |                |      |                                      |     | <i>SLX4</i>    |      |                       |      | <i>SPATA22</i> |      | <i>PRKDC</i>   |      |
|                |      |                      |      |                |      |                                         |                 |                |      |                                      |     | <i>SMG1</i>    |      |                       |      | <i>WRN</i>     |      | <i>SPATA22</i> |      |
|                |      |                      |      |                |      |                                         |                 |                |      |                                      |     |                |      |                       |      |                |      | <i>WRN</i>     |      |



table S8. Detailed model output and  $R^2$  values for LMMs fitted to data sets with the 0-age cohort removed to facilitate a comparison of slopes (effect sizes).

| Species                          | Models Tested | Ranked AIC | Random Variables                           | Fixed Effect | Estimate | Std. Error | t-value | p-value  | $R^2$ - Marginal | $R^2$ - Conditional |
|----------------------------------|---------------|------------|--------------------------------------------|--------------|----------|------------|---------|----------|------------------|---------------------|
| <i>Myotis myotis</i>             | LMM           | 17.13      | DNA Plate, Assay Plate and Year Sampled    | Intercept    | 1.425    | 0.095      | 15.067  | 0.003    | 0.011            | 0.422               |
|                                  |               |            |                                            | Age          | -0.020   | 0.013      | -1.499  | 0.136    |                  |                     |
| <i>Myotis bechsteinii</i>        | LMM           | 107.93     | DNA Plate, Assay Plate                     | Intercept    | 2.817    | 0.649      | 4.342   | 0.213    | 0.004            | 0.850               |
|                                  |               |            |                                            | Age          | -0.021   | 0.019      | -1.119  | 0.270    |                  |                     |
| <i>Rhinolophus ferrumequinum</i> | LMM           | -144.54    | DNA Plate and Assay Plate and Year Sampled | Intercept    | 1.025    | 0.255      | 4.022   | 0.147    | 0.008            | 0.919               |
|                                  |               |            |                                            | Age          | -0.008   | 0.002      | -3.384  | 0.001*** |                  |                     |
| <i>Miniopterus schreibersii</i>  | LMM           | -96.19     | DNA Plate and Assay Plate                  | Intercept    | 1.205    | 0.021      | 57.063  | 0.000    | 0.206            | 0.332               |
|                                  |               |            |                                            | Age          | -0.005   | 0.002      | -2.501  | 0.027 *  |                  |                     |

**table S9. Results of pairwise comparisons of DEGs in *Myotis* compared to other mammals across tissue types.**

| <b>Brain</b>                    |                     |                       |                        |
|---------------------------------|---------------------|-----------------------|------------------------|
| <b>Pairwise comparison</b>      | <b>Up-regulated</b> | <b>Down-regulated</b> | <b>Non-significant</b> |
| <i>Myotis</i> vs Cow            | 6                   | 76                    | 94                     |
| <i>Myotis</i> vs Human          | 65                  | 4                     | 120                    |
| <i>Myotis</i> vs Mouse          | 75                  | 13                    | 90                     |
| <i>Myotis</i> vs Naked mole rat | 72                  | 5                     | 114                    |
| <i>Myotis</i> vs Rat            | 58                  | 10                    | 110                    |
| <b>Blood</b>                    |                     |                       |                        |
| <b>Pairwise comparison</b>      | <b>Up-regulated</b> | <b>Down-regulated</b> | <b>Non-significant</b> |
| <i>Myotis</i> vs Human          | 129                 | 5                     | 55                     |
| <i>Myotis</i> vs Mouse          | 110                 | 7                     | 65                     |
| <i>Myotis</i> vs Pig            | 74                  | 17                    | 66                     |
| <b>Liver</b>                    |                     |                       |                        |
| <b>Pairwise comparison</b>      | <b>Up-regulated</b> | <b>Down-regulated</b> | <b>Non-significant</b> |
| <i>Myotis</i> vs Cow            | 8                   | 99                    | 69                     |
| <i>Myotis</i> vs Human          | 69                  | 7                     | 113                    |
| <i>Myotis</i> vs Mouse          | 86                  | 18                    | 78                     |
| <i>Myotis</i> vs Naked mole rat | 79                  | 12                    | 100                    |
| <i>Myotis</i> vs Pig            | 38                  | 20                    | 99                     |
| <i>Myotis</i> vs Rat            | 61                  | 14                    | 103                    |
| <i>Myotis</i> vs Whale          | 22                  | 47                    | 120                    |
| <b>Kidney</b>                   |                     |                       |                        |
| <b>Pairwise comparison</b>      | <b>Up-regulated</b> | <b>Down-regulated</b> | <b>Non-significant</b> |
| <i>Myotis</i> vs Cow            | 7                   | 97                    | 72                     |
| <i>Myotis</i> vs Human          | 89                  | 4                     | 96                     |
| <i>Myotis</i> vs Mouse          | 88                  | 18                    | 76                     |
| <i>Myotis</i> vs Naked mole rat | 98                  | 5                     | 88                     |
| <i>Myotis</i> vs Pig            | 43                  | 16                    | 98                     |
| <i>Myotis</i> vs Rat            | 73                  | 12                    | 93                     |
| <i>Myotis</i> vs Whale          | 20                  | 59                    | 110                    |

**table S10. GO terms corresponding to biological processes which are significantly enriched in the telomere maintenance protein-protein interaction network.**

| Pathway ID | Pathway Description                                     | Observed Gene Count | FDR      | Matching proteins in the network                                                    |
|------------|---------------------------------------------------------|---------------------|----------|-------------------------------------------------------------------------------------|
| GO.0032200 | telomere organization                                   | 10                  | 1.11E-15 | ATM, MRE11A, PARP1, RAD50, RFC3, RPA1, TERF2IP, WRAP53, WRN, XRCC5                  |
| GO.0000723 | telomere maintenance                                    | 9                   | 1.10E-13 | ATM, MRE11A, PARP1, RAD50, RFC3, RPA1, TERF2IP, WRN, XRCC5                          |
| GO.0006281 | DNA repair                                              | 12                  | 3.34E-12 | ABL1, ATM, DCLRE1A, MLH3, MRE11A, PARP1, RAD50, RFC3, RPA1, SETX, WRN, XRCC5        |
| GO.0051276 | chromosome organization                                 | 13                  | 2.84E-10 | ATM, MLH3, MRE11A, PARP1, RAD50, RB1, RFC3, RPA1, SETX, TERF2IP, WRAP53, WRN, XRCC5 |
| GO.0006974 | cellular response to DNA damage stimulus                | 12                  | 5.16E-10 | ABL1, ATM, DCLRE1A, MLH3, MRE11A, RAD50, RFC3, RPA1, SETX, TERF2IP, WRN, XRCC5      |
| GO.0006302 | double-strand break repair                              | 8                   | 9.93E-10 | ATM, MRE11A, PARP1, RAD50, RPA1, SETX, WRN, XRCC5                                   |
| GO.0006310 | DNA recombination                                       | 8                   | 1.52E-08 | MLH3, MRE11A, RAD50, RFC3, RPA1, SETX, WRN, XRCC5                                   |
| GO.0060249 | anatomical structure homeostasis                        | 8                   | 1.92E-07 | ATM, MRE11A, PARP1, RAD50, RFC3, TERF2IP, WRN, XRCC5                                |
| GO.0010833 | telomere maintenance via telomere lengthening           | 5                   | 3.33E-07 | MRE11A, RAD50, RFC3, RPA1, TERF2IP                                                  |
| GO.0006259 | DNA metabolic process                                   | 10                  | 3.37E-07 | ABL1, DCLRE1A, MLH3, MRE11A, RAD50, RFC3, RPA1, SETX, TERF2IP, XRCC5                |
| GO.0006284 | base-excision repair                                    | 5                   | 1.42E-06 | MRE11A, PARP1, RFC3, RPA1, WRN                                                      |
| GO.0032508 | DNA duplex unwinding                                    | 5                   | 1.79E-06 | MRE11A, RAD50, SETX, WRN, XRCC5                                                     |
| GO.0006260 | DNA replication                                         | 6                   | 3.03E-05 | MRE11A, RAD50, RFC3, RPA1, TERF2IP, WRN                                             |
| GO.0007131 | reciprocal meiotic recombination                        | 4                   | 3.03E-05 | ATM, MLH3, MRE11A, RAD50                                                            |
| GO.0007004 | telomere maintenance via telomerase                     | 3                   | 0.000117 | MRE11A, RAD50, TERF2IP                                                              |
| GO.0000724 | double-strand break repair via homologous recombination | 4                   | 0.000588 | ATM, MRE11A, RAD50, RPA1                                                            |
| GO.0042592 | homeostatic process                                     | 9                   | 0.00079  | ATM, MRE11A, PARP1, RAD50, RB1, RFC3, TERF2IP, WRN, XRCC5                           |
| GO.0006298 | mismatch repair                                         | 3                   | 0.00137  | ABL1, MLH3, RPA1                                                                    |

| Pathway ID | Pathway Description                          | Observed Gene Count | FDR     | Matching proteins in the network                                               |
|------------|----------------------------------------------|---------------------|---------|--------------------------------------------------------------------------------|
| GO.0040009 | regulation of growth rate                    | 2                   | 0.00166 | PARP1, WRN                                                                     |
| GO.0042769 | DNA damage response, detection of DNA damage | 3                   | 0.0029  | PARP1, RFC3, RPA1                                                              |
| GO.0000019 | regulation of mitotic recombination          | 2                   | 0.00307 | MRE11A, RAD50                                                                  |
| GO.0030097 | hemopoiesis                                  | 6                   | 0.00332 | ABL1, ATM, PARP1, RB1, RPA1, XRCC5                                             |
| GO.0070192 | chromosome organization involved in meiosis  | 3                   | 0.00427 | MLH3, MRE11A, RAD50                                                            |
| GO.0000018 | regulation of DNA recombination              | 3                   | 0.0102  | MRE11A, RAD50, TERF2IP                                                         |
| GO.0002327 | immature B cell differentiation              | 2                   | 0.0114  | ABL1, ATM                                                                      |
| GO.0006975 | DNA damage induced protein phosphorylation   | 2                   | 0.0114  | ABL1, ATM                                                                      |
| GO.1902589 | single-organism organelle organization       | 9                   | 0.0128  | DCLRE1A, MRE11A, PARP1, RAD50, RB1, RFC3, TERF2IP, WRN, XRCC5                  |
| GO.0000280 | nuclear division                             | 5                   | 0.0182  | ABL1, ATM, DCLRE1A, RB1, RPA1                                                  |
| GO.0065009 | regulation of molecular function             | 10                  | 0.0203  | ABL1, ATM, DOT1L, MRE11A, PARP1, RAD50, RB1, TERF2IP, WRAP53, WRN              |
| GO.0090304 | nucleic acid metabolic process               | 12                  | 0.0203  | ABL1, DCLRE1A, MLH3, MRE11A, RAD50, RB1, RFC3, RPA1, SSB, TERF2IP, WRN, XRCC5  |
| GO.0000731 | DNA synthesis involved in DNA repair         | 2                   | 0.0218  | RFC3, WRN                                                                      |
| GO.0006289 | nucleotide-excision repair                   | 3                   | 0.0218  | DCLRE1A, RFC3, RPA1                                                            |
| GO.0090305 | nucleic acid phosphodiester bond hydrolysis  | 4                   | 0.0218  | DCLRE1A, MRE11A, RAD50, WRN                                                    |
| GO.0007095 | mitotic G2 DNA damage checkpoint             | 2                   | 0.0249  | ATM, MRE11A                                                                    |
| GO.0044710 | single-organism metabolic process            | 12                  | 0.0249  | ABL1, ATM, DCLRE1A, MLH3, MRE11A, RAD50, RFC3, RPA1, SETX, TERF2IP, WRN, XRCC5 |
| GO.0071897 | DNA biosynthetic process                     | 3                   | 0.0249  | RFC3, RPA1, WRN                                                                |
| GO.0006261 | DNA-dependent DNA replication                | 3                   | 0.0252  | RFC3, RPA1, WRN                                                                |
| GO.0000278 | mitotic cell cycle                           | 6                   | 0.0271  | ABL1, ATM, DCLRE1A, RB1, RFC3, RPA1                                            |
| GO.0006996 | organelle organization                       | 10                  | 0.0274  | DCLRE1A, MRE11A, RAD50, RB1, RFC3, SETX, TERF2IP, WRAP53, WRN, XRCC5           |



| <b>Pathway ID</b> | <b>Pathway Description</b>                               | <b>Observed Gene Count</b> | <b>FDR</b> | <b>Matching proteins in the network</b> |
|-------------------|----------------------------------------------------------|----------------------------|------------|-----------------------------------------|
| GO.0016925        | protein sumoylation                                      | 3                          | 0.0282     | PARP1, RPA1, WRN                        |
| GO.0051338        | regulation of transferase activity                       | 6                          | 0.0363     | ABL1, ATM, MRE11A, RAD50, RB1, WRAP53   |
| GO.0071480        | cellular response to gamma radiation                     | 2                          | 0.0366     | ATM, WRN                                |
| GO.0006297        | nucleotide-excision repair, DNA gap filling              | 2                          | 0.0374     | RFC3, RPA1                              |
| GO.0031954        | positive regulation of protein autophosphorylation       | 2                          | 0.0374     | MRE11A, RAD50                           |
| GO.0051052        | regulation of DNA metabolic process                      | 4                          | 0.0374     | MRE11A, RAD50, TERF2IP, WRAP53          |
| GO.0070987        | error-free translesion synthesis                         | 2                          | 0.0374     | RFC3, RPA1                              |
| GO.0042276        | error-prone translesion synthesis                        | 2                          | 0.0404     | RFC3, RPA1                              |
| GO.0006303        | double-strand break repair via nonhomologous end joining | 2                          | 0.0441     | MRE11A, XRCC5                           |
| GO.0002520        | immune system development                                | 5                          | 0.0459     | ABL1, PARP1, RB1, RPA1, XRCC5           |
| GO.0032201        | telomere maintenance via semi-conservative replication   | 2                          | 0.0463     | RFC3, RPA1                              |
| GO.0098813        | nuclear chromosome segregation                           | 3                          | 0.0492     | MLH3, MRE11A, RB1                       |

**table S11. KEGG pathways which are significantly enriched in the telomere maintenance protein-protein interaction network.**

| <b>Pathway ID</b> | <b>Pathway Description</b> | <b>Gene Count</b> | <b>FDR</b> | <b>Matching proteins in the network</b> |
|-------------------|----------------------------|-------------------|------------|-----------------------------------------|
| 3450              | Non-homologous end-joining | 3                 | 7.60E-05   | MRE11A, RAD50, XRCC5                    |
| 3430              | Mismatch repair            | 3                 | 0.000234   | MLH3, RFC3, RPA1                        |
| 3440              | Homologous recombination   | 3                 | 0.000257   | MRE11A, RAD50, RPA1                     |
| 4110              | Cell cycle                 | 3                 | 0.0178     | ABL1, ATM, RB1                          |
| 3030              | DNA replication            | 2                 | 0.0336     | RFC3, RPA1                              |
| 3420              | Nucleotide excision repair | 2                 | 0.0484     | RFC3, RPA1                              |

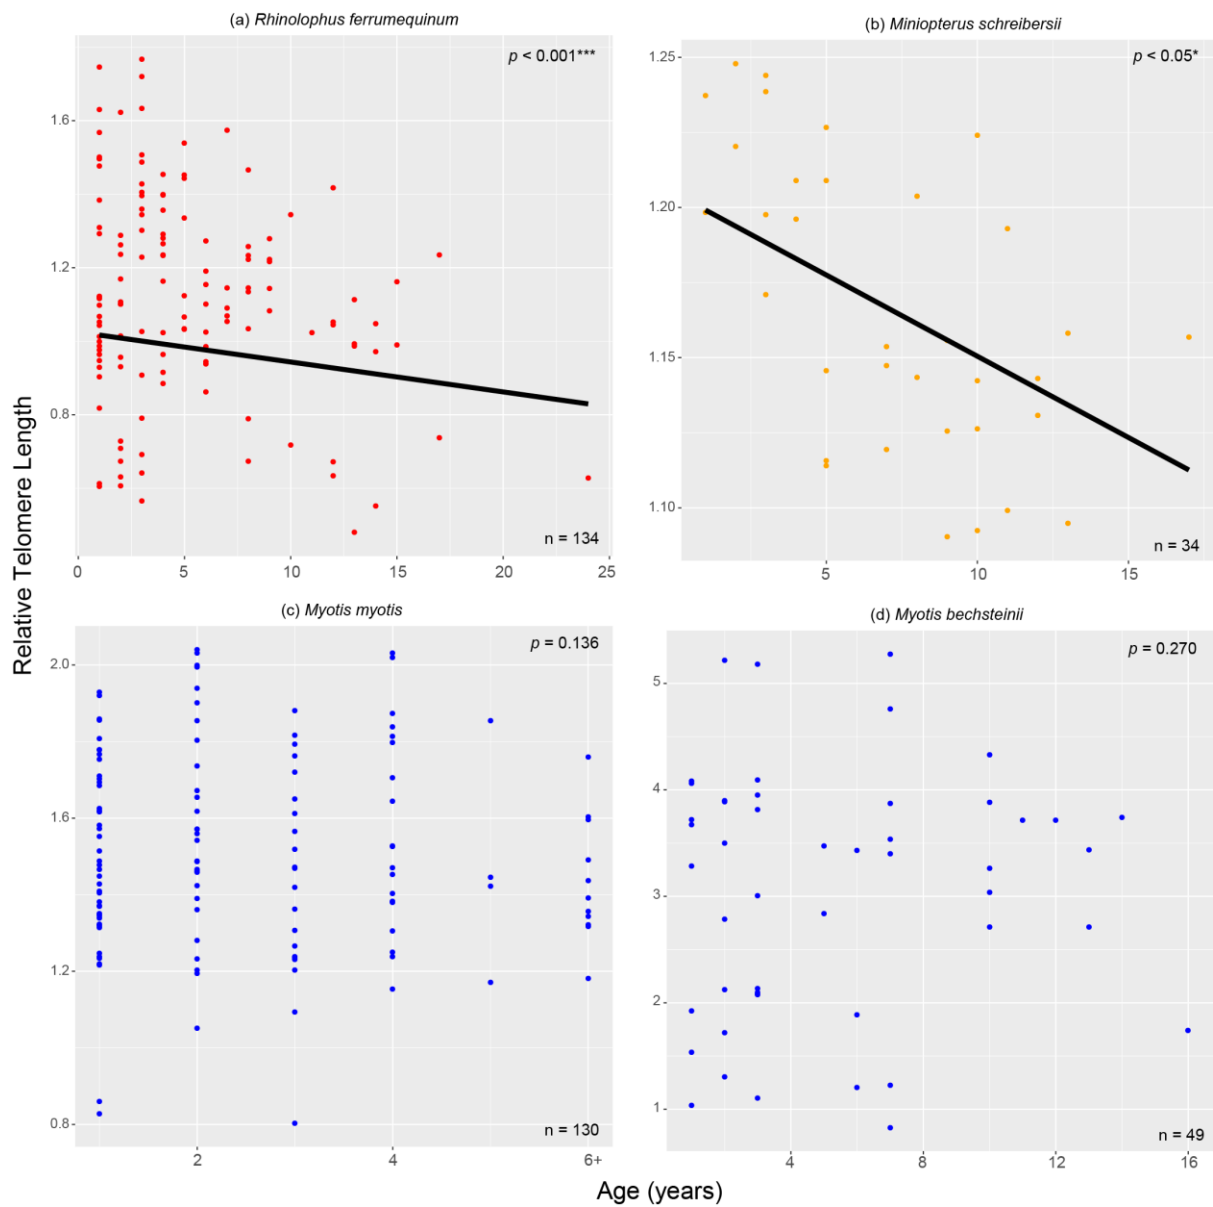

**fig. S1. LMMs fitted to each data set after the removal of the 0-age cohort.** These results are consistent with the analysis of the data sets with the 0 age cohort included.

## Distribution of $p$ -values from 100 jackknifed datasets

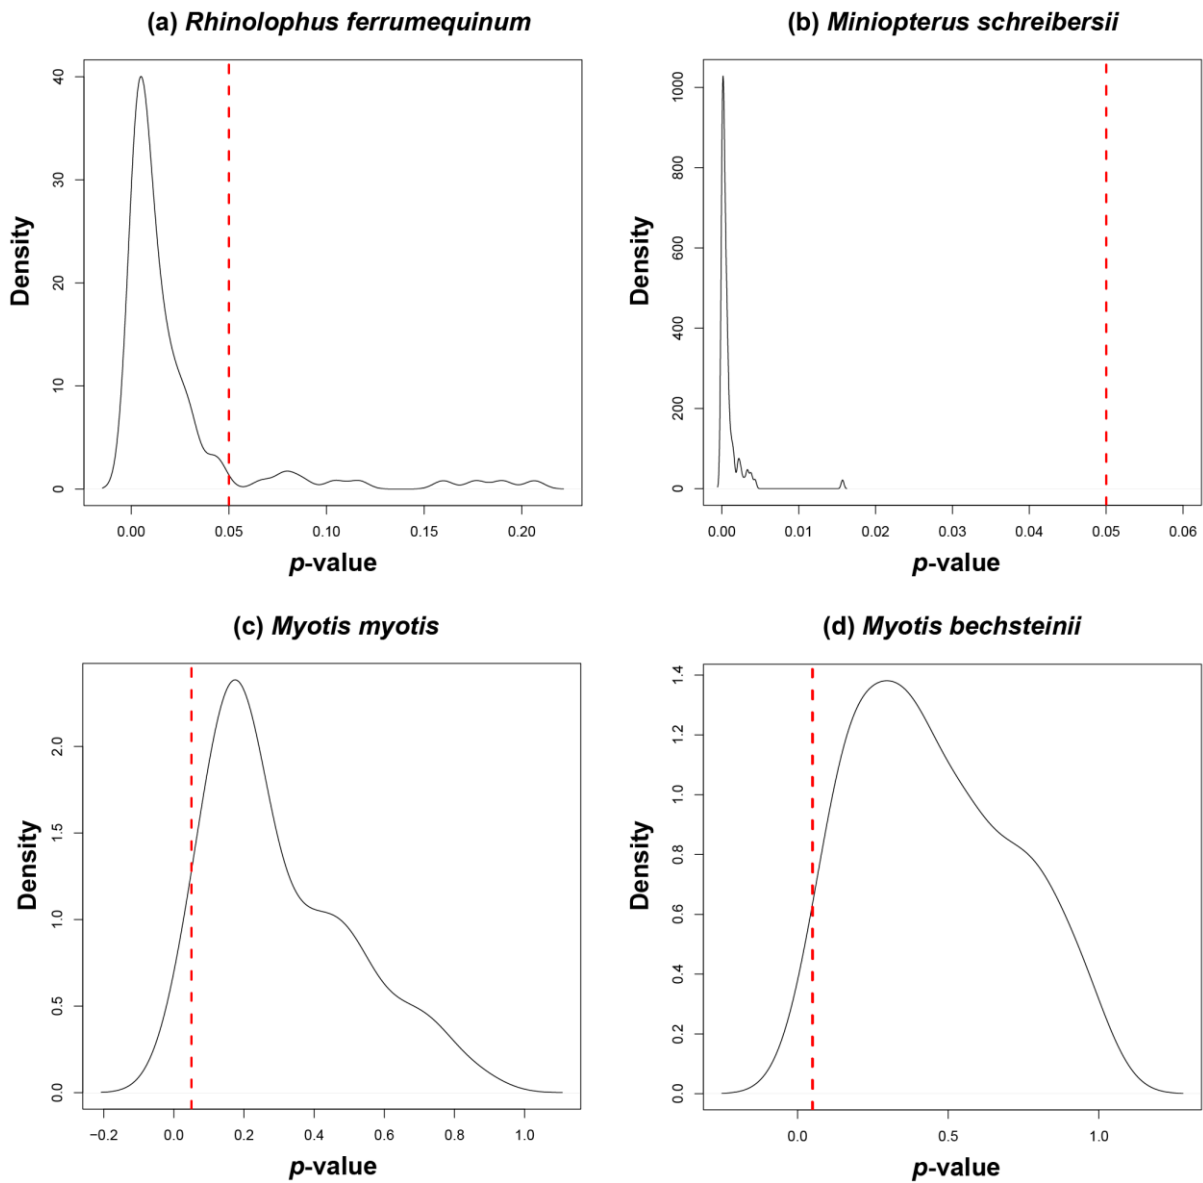

**fig. S2. Analysis of  $P$  values arising from 100 jackknifed models of telomere length versus age.** Posterior density distributions of 100  $P$  values obtained through jackknife analyses of telomere length vs age models for a) *R. ferrumequinum*, b) *M. schreibersii*, c) *M. myotis* and d) *M. bechsteinii*. Results to the left of the red line at 0.05 are significant. Note that scales differ between plots.

# Distribution of slope values from 100 jackknifed datasets

(a) *Rhinolophus ferrumequinum*

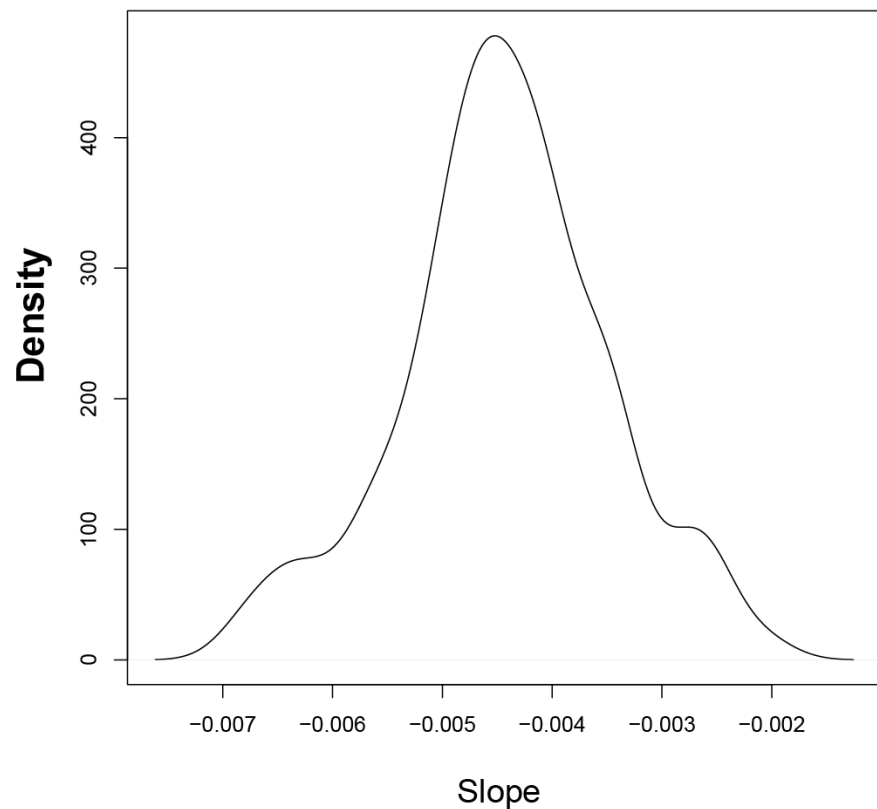

(b) *Miniopterus schreibersii*

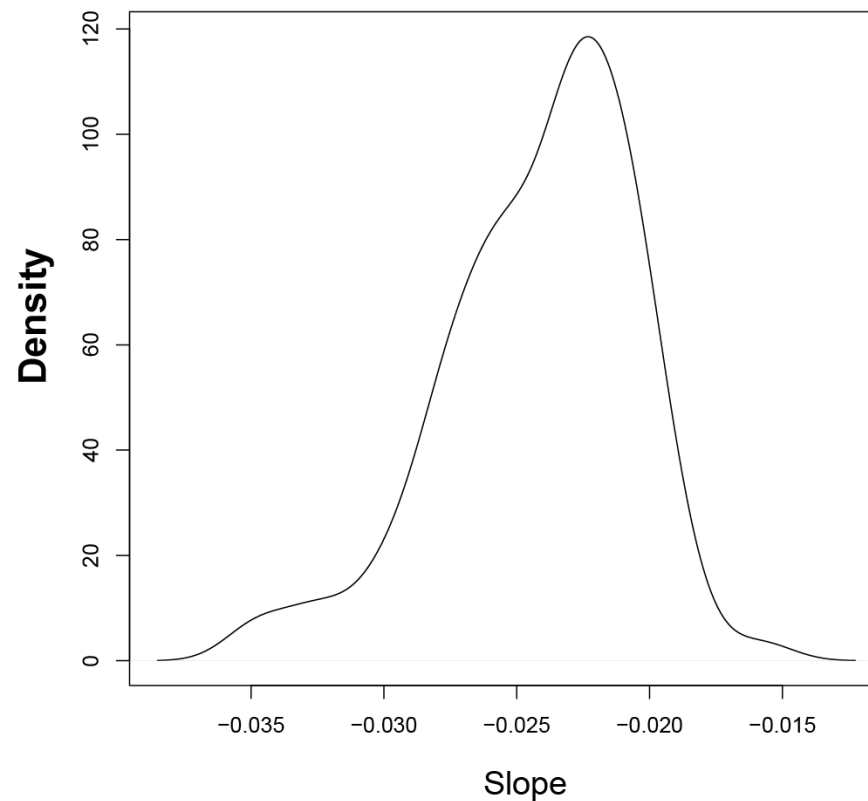

**fig. S3. Analysis of slope values arising from 100 jackknifed models of telomere length versus age.** Posterior density distributions of 100 effect sizes/slopes (proxy for telomere shortening rate) obtained through jackknife analyses of telomere length vs age models for a) *R. ferrumequinum* and b) *M. schreibersii*.

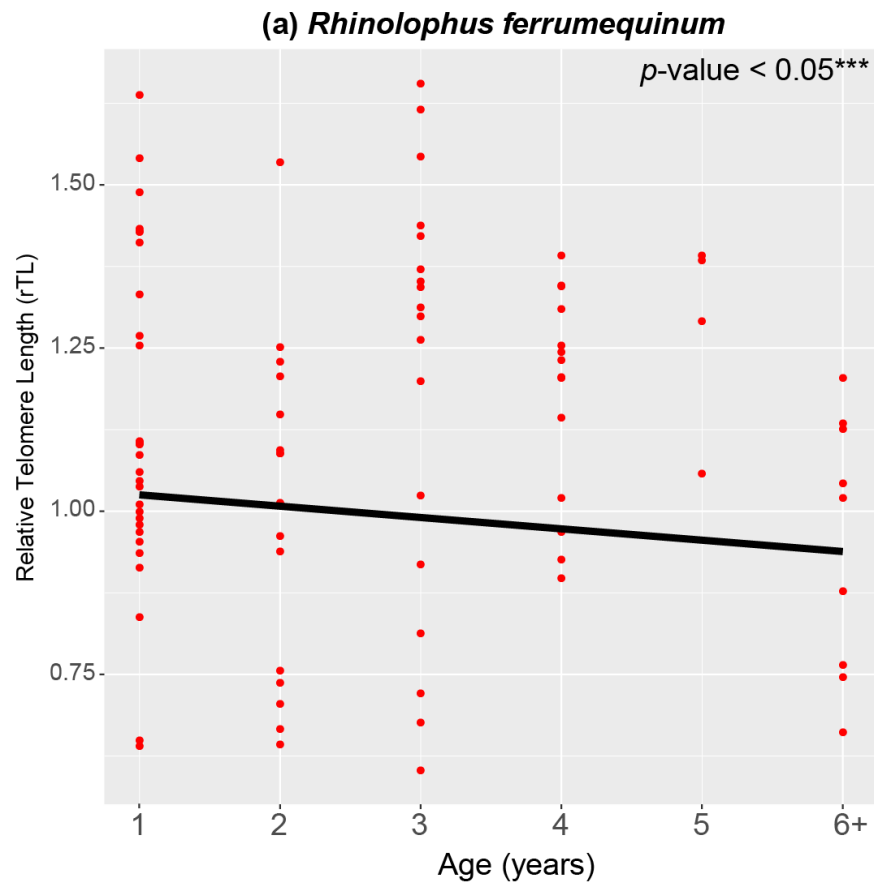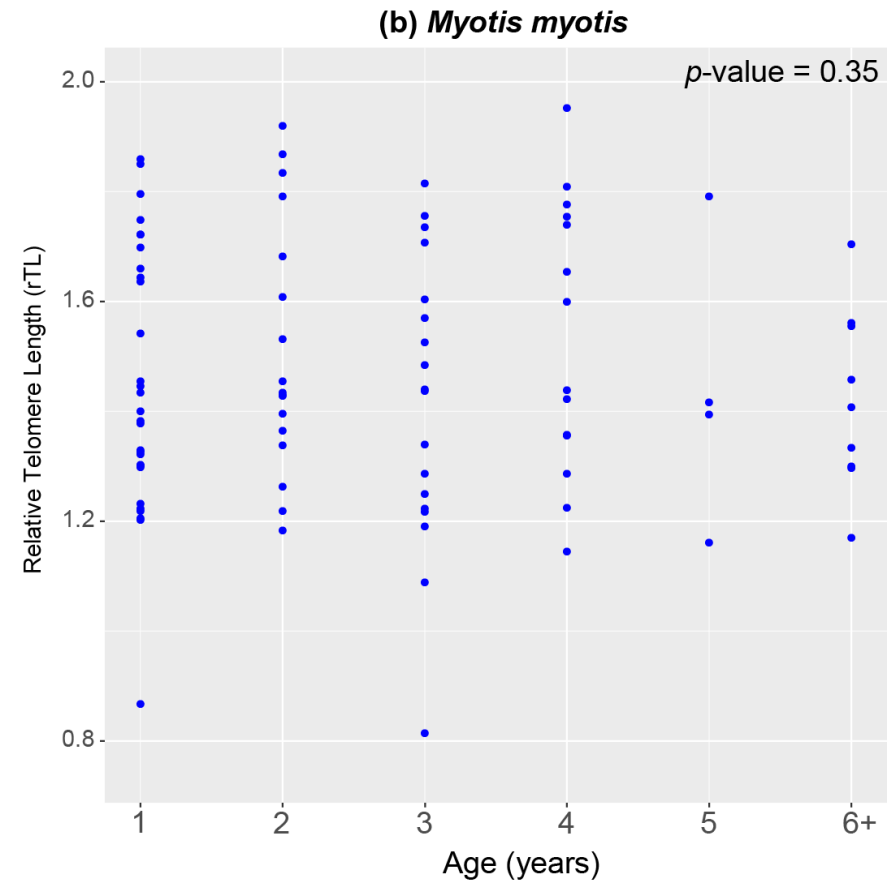

**fig. S4. Randomly subsampled *M. myotis* and *R. ferrumequinum* data sets containing equal numbers of samples per age cohorts recapitulate results from Fig. 2 and show telomeres shorten in *R. ferrumequinum*, but we do not detect a significant relationship between rTL and age in *M. myotis*. Note that scales differ between plots.**

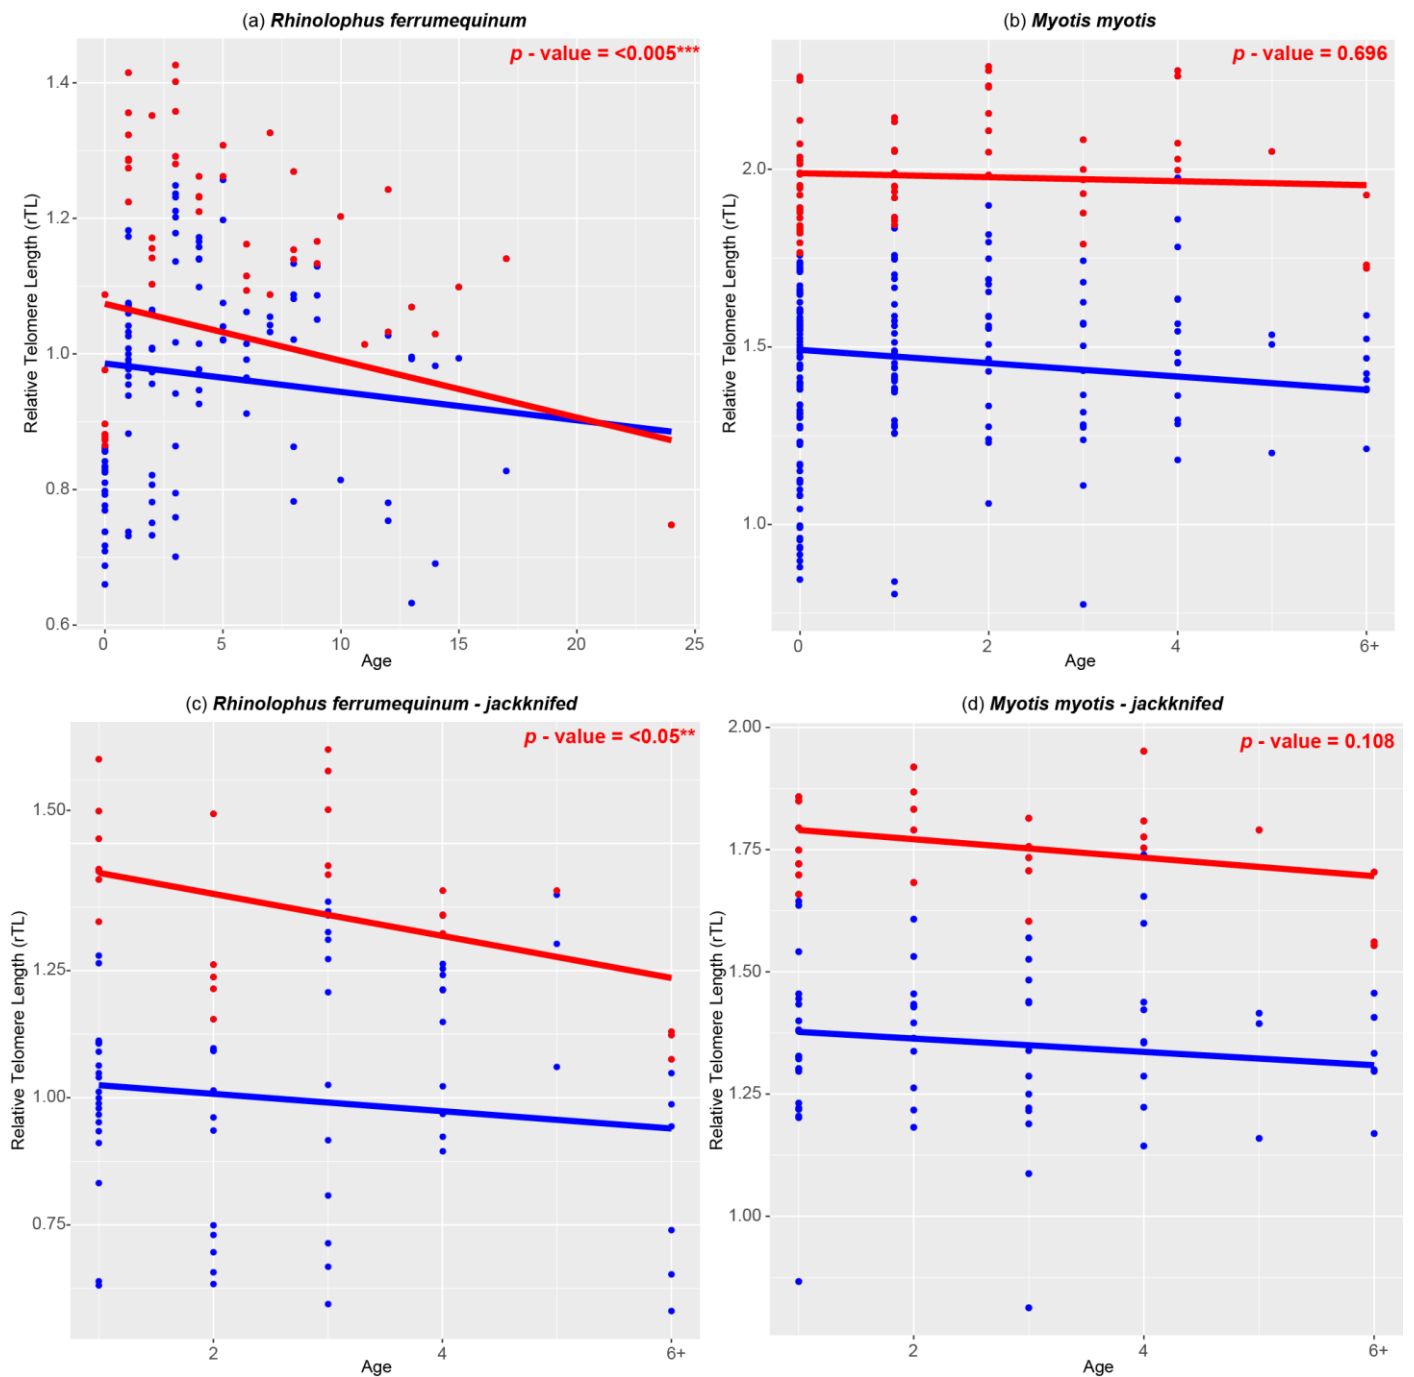

**fig. S5. Upper quartile regression analysis.** Upper quartile regression for (a) *R. ferrumequinum* and (b) *M. myotis* data sets shown in Fig. 2 and jackknifed data sets for (c) *R. ferrumequinum* and (d) *M. myotis* data sets shown in fig. S3. Upper quartile samples are highlighted in red and red lines represent the fitted upper quartile models for all data sets.  $P$  values are shown for upper regression models. Note that scales differ between plots.

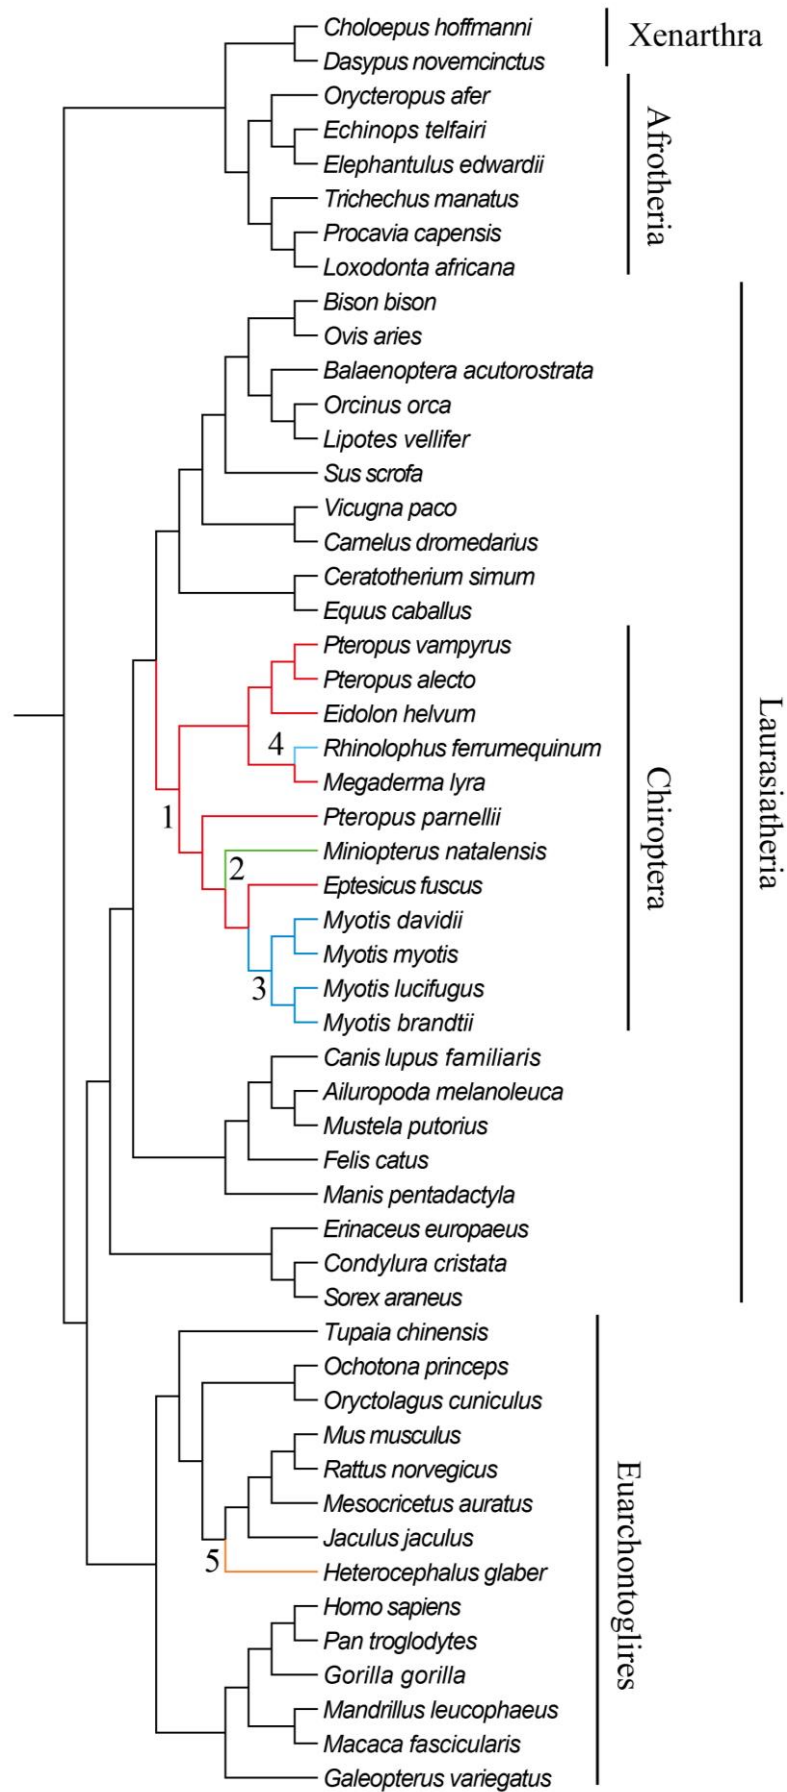

fig. S6. Tree topology used for selective pressure analyses. Branches tested are colour coded and labelled 1-5.



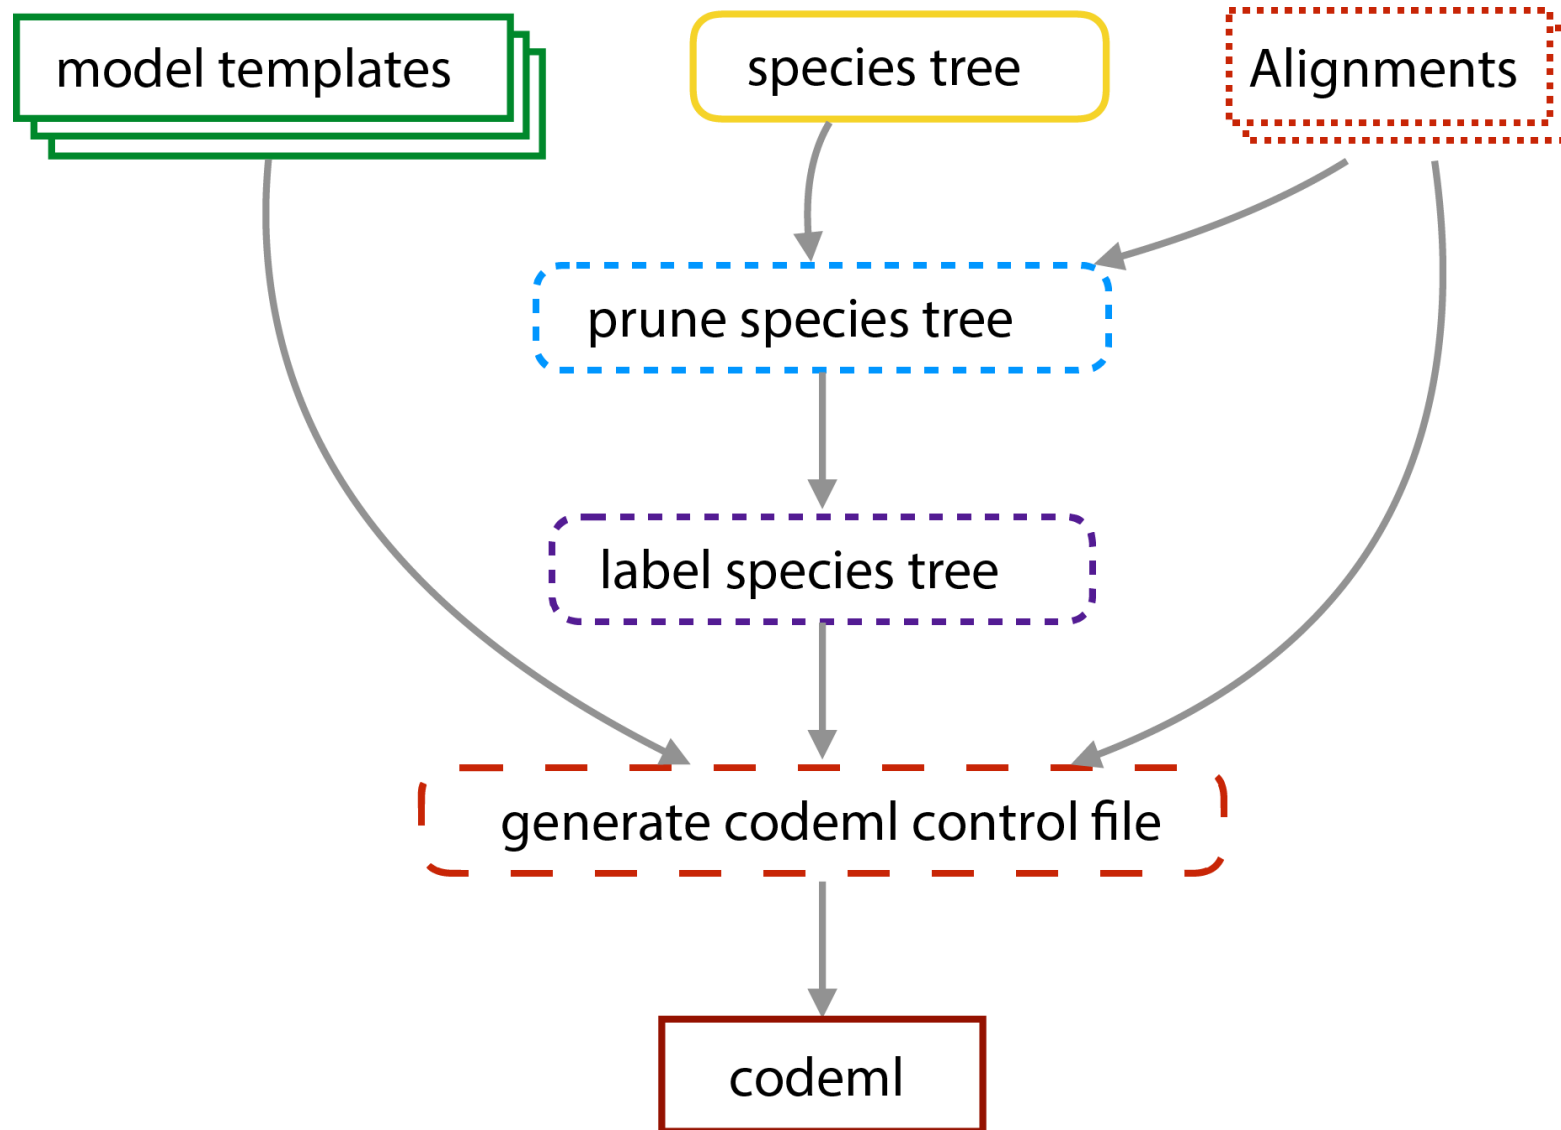

fig. S7. Schematic depicting steps in the OH-SNAP workflow to automate CodeML analysis.

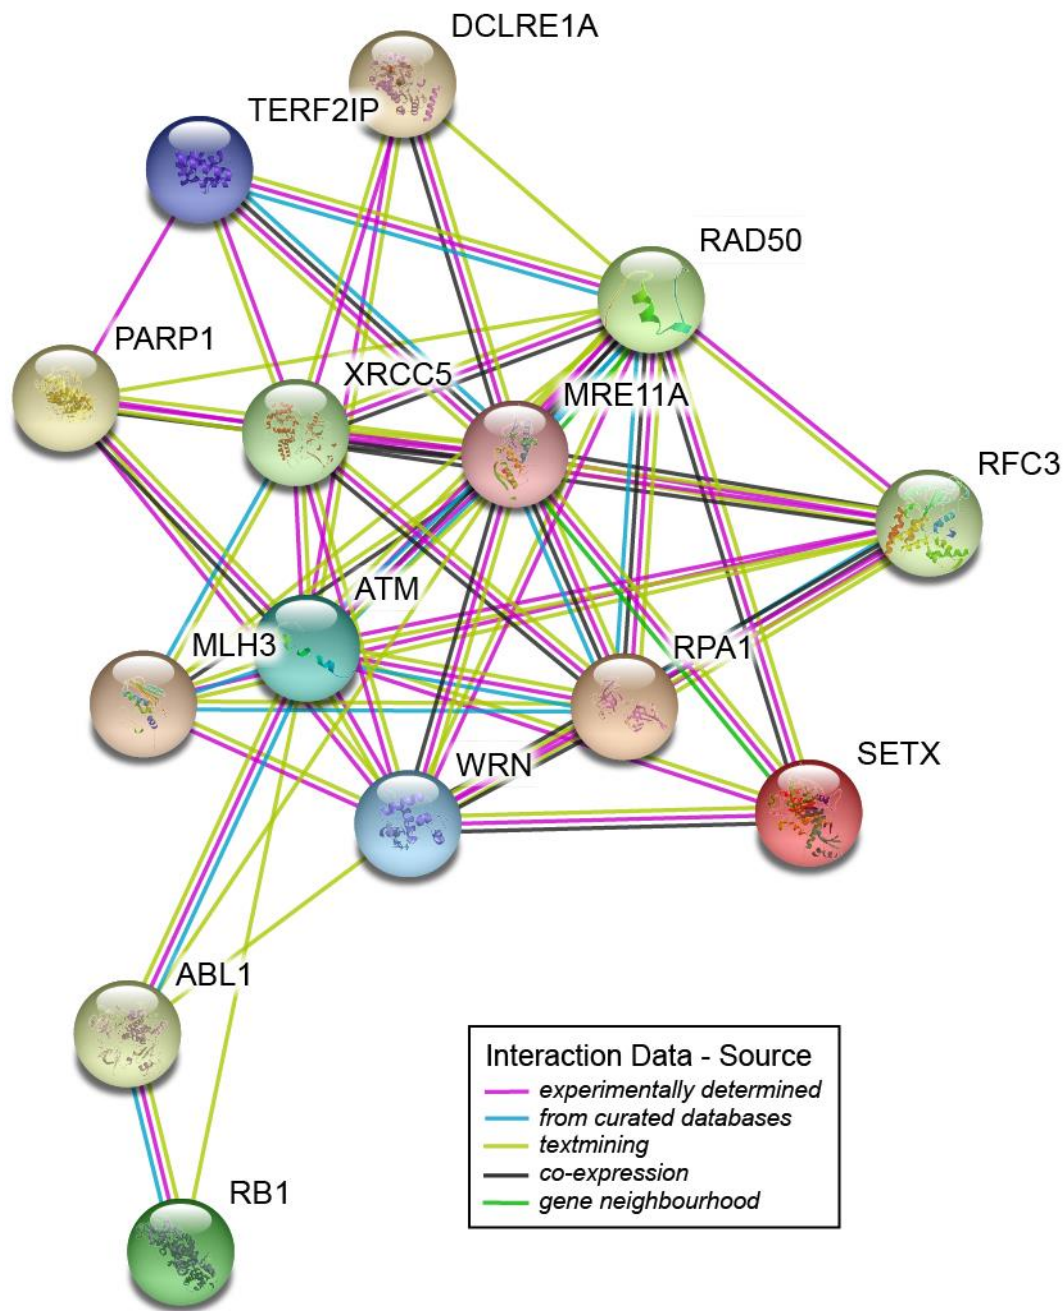

**fig. S8. STRING protein-protein-interaction network for 14 significantly DEGs in *Myotis* bats compared to all other mammals.** The network depicts direct interaction between 14 telomere maintenance proteins with additional functions in DNA repair.
